# Supplementary material for: Competition between fluorescence and triplet production ruled by nitro groups in one-arm and two-arm styrylbenzene heteroanalogues
Source: Royal Society of Chemistry journal article supplement (doi:10.1039/d0pp00271b), 2020-11-04
Supplement: d0pp00271b1.pdf [file d0pp00271b1.pdf]

## Competition between fluorescence and triplet production ruled by nitro groups in one-arm and two-arm styrylbenzene heteroanalogues

Letizia Mencaroni<sup>a</sup>, Benedetta Carlotti<sup>a</sup>, Alessio Cesaretti<sup>a</sup>, Fausto Elisei<sup>a</sup>, Ana Grgičević<sup>b</sup>, Irena Škorić<sup>b</sup>, Anna Spalletti<sup>a,\*</sup>

### ELECTRONIC SUPPORTING INFORMATION

#### Steady-state absorption spectra

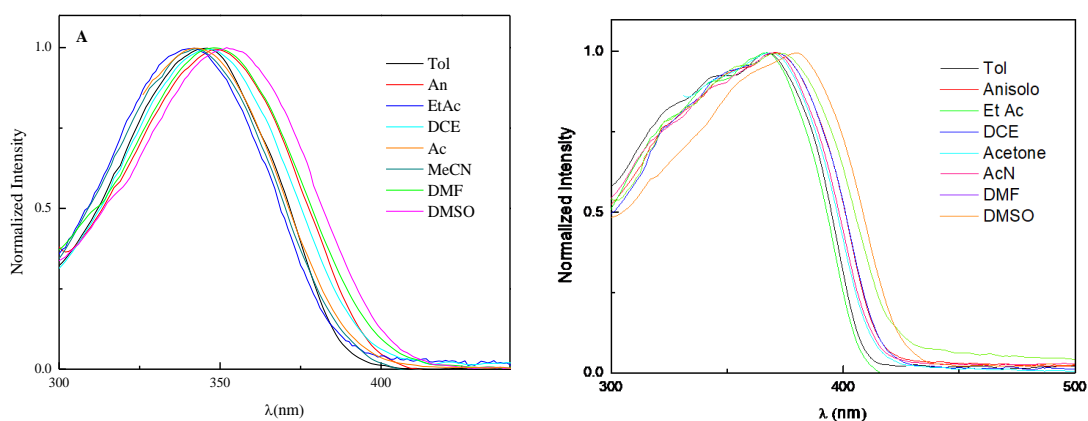

**Figure ESI.1.** Normalized absorption spectra of compounds **DP** (left) and **QP** (right) in solvents of different polarity (from Ref. [29] B. Carlotti, A. Cesaretti, G. Cacioppa, F. Elisei, I. Odak, I. Škorić, A. Spalletti, *J. Photochem. Photobiol. A* 368 (2019) 190–199).

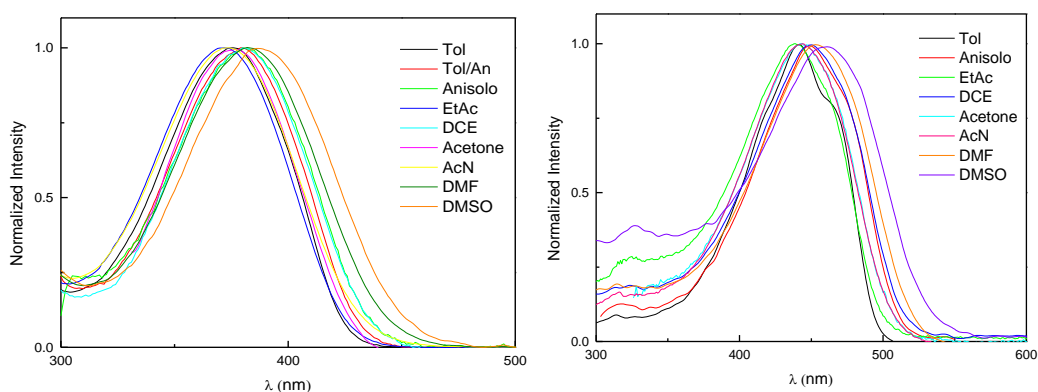

**Figure ESI.2.** Normalized absorption spectra of compounds **DF** (left) and **QF** (right) in solvents of different polarity (from Ref. [29] B. Carlotti, A. Cesaretti, G. Cacioppa, F. Elisei, I. Odak, I. Škorić, A. Spalletti, *J. Photochem. Photobiol. A* 368 (2019) 190–199).

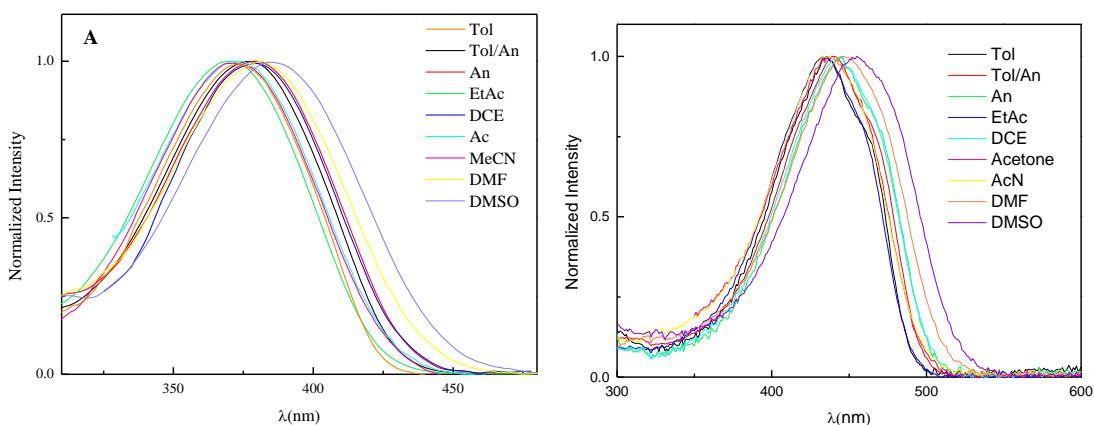

**Figure ESI.3.** Normalized absorption spectra of compounds **DT** (left) and **QT** (right) in solvents of different polarity (from Ref. [29] B. Carlotti, A. Cesaretti, G. Cacioppa, F. Elisei, I. Odak, I. Škorić, A. Spalletti, *J. Photochem. Photobiol. A* 368 (2019) 190–199).

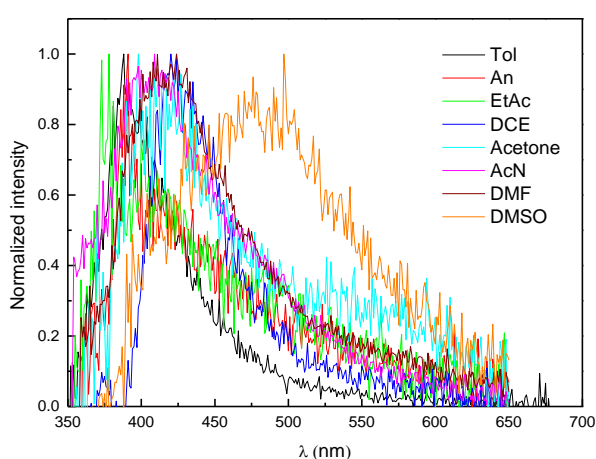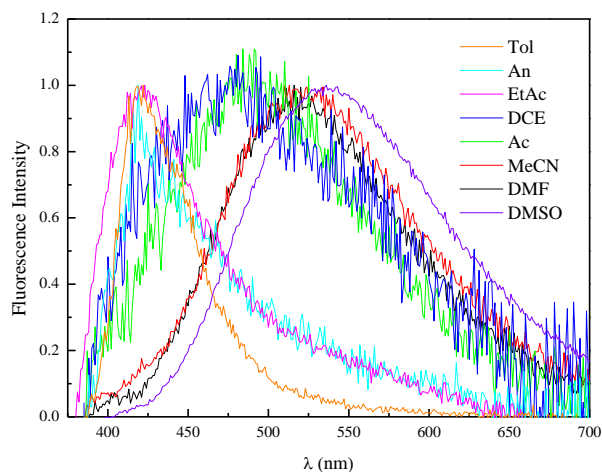

**Figure ESI.4.** Normalized emission spectra of compounds **DP** (left) and **QP** (right) in solvents of different polarity (from Ref. [29] B. Carloti, A. Cesaretti, G. Cacioppa, F. Elisei, I. Odak, I. Škorić, A. Spalletti, *J. Photochem. Photobiol. A* 368 (2019) 190–199).

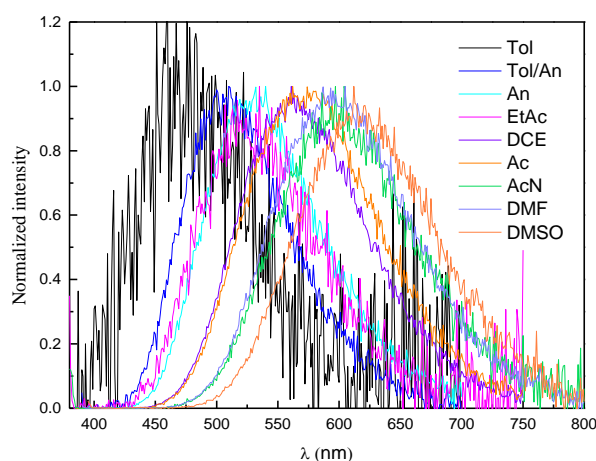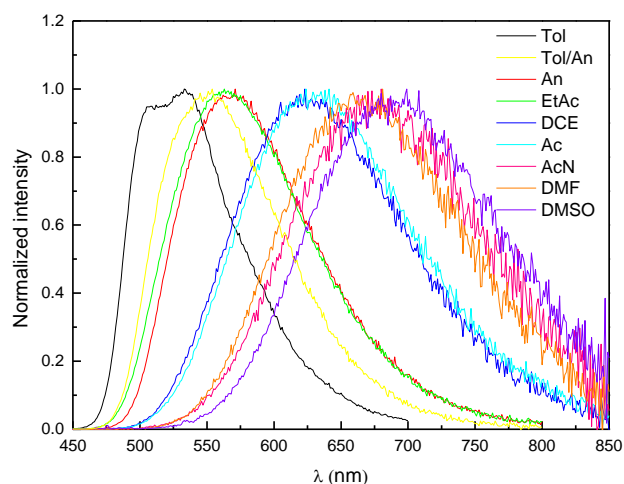

**Figure ESI.5.** Normalized emission spectra of compounds **DF** (left) and **QF** (right) in solvents of different polarity (from Ref. [29] B. Carloti, A. Cesaretti, G. Cacioppa, F. Elisei, I. Odak, I. Škorić, A. Spalletti, *J. Photochem. Photobiol. A* 368 (2019) 190–199).

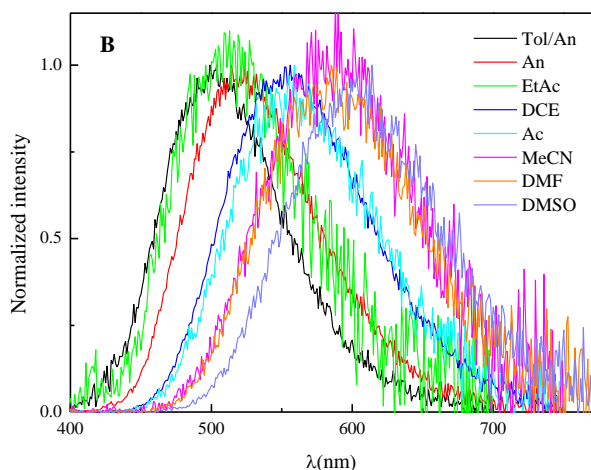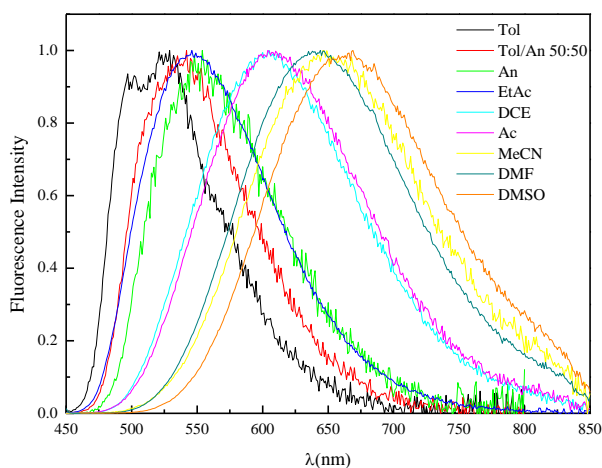

**Figure ESI.6.** Normalized emission spectra of compounds **DT** (left) and **QT** (right) in solvents of different polarity (from Ref. [29] B. Carloti, A. Cesaretti, G. Cacioppa, F. Elisei, I. Odak, I. Škorić, A. Spalletti, *J. Photochem. Photobiol. A* 368 (2019) 190–199).

## Quantum mechanical calculations

**Table ESI.1.** Theoretical absorption and emission wavelengths of **DP**, oscillator strengths, nature and composition in terms of molecular orbitals obtained by TD WB97XD/6-31+G(d)//B-3LYP/6-31+G(d) in Tol (CPCM) compared to the experimental absorption spectra.

| Transition               | $\lambda_{th} / \text{nm}$ | f      | configuration                       | $c_i^2 / \%$ | $\lambda_{exp} / \text{nm}$ |
|--------------------------|----------------------------|--------|-------------------------------------|--------------|-----------------------------|
| $S_0 \rightarrow T_1$    | 581                        | 0.0000 | $\pi_H \rightarrow \pi_L^*$         | 67           |                             |
| $S_0 \rightarrow T_2$    | 439                        | 0.0000 | $\pi_{H-6} \rightarrow \pi_L^*$     | 70           |                             |
| $S_0 \rightarrow T_3$    | 373                        | 0.0000 | $n_{H-5} \rightarrow \pi_L^*$       | 72           |                             |
| $S_0 \rightarrow T_4$    | 368                        | 0.0000 | $\pi_H \rightarrow \pi_{L+1}^*$     | 31           |                             |
| $S_0 \rightarrow S_1$    | 342                        | 1.2603 | $\pi_H \rightarrow \pi_L^*$         | 86           | 343                         |
| $S_0 \rightarrow S_2$    | 324                        | 0.0000 | $n_{H-5} \rightarrow \pi_L^*$       | 74           |                             |
| $S_0 \rightarrow T_5$    | 323                        | 0.0000 | $\pi_{H-2} \rightarrow \pi_L^*$     | 88           |                             |
| $S_0 \rightarrow T_6$    | 315                        | 0.0000 | $n_{H-7} \rightarrow \pi_L^*$       | 73           |                             |
| $S_0 \rightarrow T_7$    | 306                        | 0.0000 | $n_{H-1} \rightarrow \pi_{L+1}^*$   | 47           |                             |
| $S_0 \rightarrow T_8$    | 301                        | 0.0000 | $\pi_{H-3} \rightarrow \pi_{L+2}^*$ | 30           |                             |
| $S_0 \rightarrow T_9$    | 284                        | 0.0000 | $\pi_{H-2} \rightarrow \pi_{L+3}^*$ | 74           |                             |
| $S_0 \rightarrow S_3$    | 281                        | 0.0004 | $n_{H-7} \rightarrow \pi_L^*$       | 75           |                             |
| $S_0 \rightarrow T_{10}$ | 280                        | 0.0000 | $\pi_H \rightarrow \pi_{L+2}^*$     | 34           |                             |
| $S_0 \rightarrow S_4$    | 279                        | 0.0315 | $\pi_{H-2} \rightarrow \pi_L^*$     | 85           |                             |
| $S_0 \rightarrow S_5$    | 273                        | 0.0026 | $n_{H-1} \rightarrow \pi_{L+1}^*$   | 48           |                             |
| $S_0 \rightarrow S_6$    | 261                        | 0.0171 | $\pi_H \rightarrow \pi_{L+1}^*$     | 61           |                             |
| $S_0 \rightarrow S_7$    | 237                        | 0.0485 | $\pi_H \rightarrow \pi_{L+2}^*$     | 49           |                             |
| $S_0 \rightarrow S_8$    | 229                        | 0.0023 | $n_{H-1} \rightarrow \pi_{L+2}^*$   | 90           |                             |
| $S_0 \rightarrow S_9$    | 224                        | 0.0907 | $\pi_H \rightarrow \pi_{L+3}^*$     | 57           |                             |
| $S_0 \rightarrow S_{10}$ | 218                        | 0.0207 | $\pi_{H-3} \rightarrow \pi_L^*$     | 45           |                             |
| $S_1 \rightarrow S_0$    | 406                        | 1.3339 | $\pi_H \rightarrow \pi_L^*$         | 99           | 388                         |

**Table ESI.2.** Theoretical absorption and emission wavelengths of **DF**, oscillator strengths, nature and composition in terms of molecular orbitals obtained by TD WB97XD/6-31+G(d)//B-3LYP/6-31+G(d) in Tol (CPCM) compared to the experimental absorption spectra.

| Transition               | $\lambda_{th} / \text{nm}$ | f      | configuration                       | $c_i^2 / \%$ | $\lambda_{exp} / \text{nm}$ |
|--------------------------|----------------------------|--------|-------------------------------------|--------------|-----------------------------|
| $S_0 \rightarrow T_1$    | 666                        | 0.0000 | $\pi_H \rightarrow \pi_L^*$         | 61           |                             |
| $S_0 \rightarrow T_2$    | 439                        | 0.0000 | $n_{H-5} \rightarrow \pi_L^*$       | 73           |                             |
| $S_0 \rightarrow T_3$    | 387                        | 0.0000 | $\pi_H \rightarrow \pi_{L+1}^*$     | 27           |                             |
| $S_0 \rightarrow T_4$    | 374                        | 0.0000 | $n_{H-4} \rightarrow \pi_L^*$       | 74           |                             |
| $S_0 \rightarrow S_1$    | 369                        | 1.2488 | $\pi_H \rightarrow \pi_L^*$         | 85           | 375                         |
| $S_0 \rightarrow S_2$    | 324                        | 0.0000 | $n_{H-4} \rightarrow \pi_L^*$       | 77           |                             |
| $S_0 \rightarrow T_5$    | 321                        | 0.0000 | $\pi_{H-1} \rightarrow \pi_L^*$     | 66           |                             |
| $S_0 \rightarrow T_6$    | 315                        | 0.0000 | $n_{H-6} \rightarrow \pi_L^*$       | 75           |                             |
| $S_0 \rightarrow T_7$    | 292                        | 0.0000 | $\pi_{H-2} \rightarrow \pi_{L+1}^*$ | 13           |                             |
| $S_0 \rightarrow T_8$    | 287                        | 0.0000 | $\pi_{H-1} \rightarrow \pi_{L+2}^*$ | 40           |                             |
| $S_0 \rightarrow S_3$    | 280                        | 0.0004 | $n_{H-6} \rightarrow \pi_L^*$       | 77           |                             |
| $S_0 \rightarrow S_4$    | 279                        | 0.0273 | $\pi_{H-1} \rightarrow \pi_L^*$     | 65           |                             |
| $S_0 \rightarrow T_9$    | 269                        | 0.0194 | $\pi_H \rightarrow \pi_{L+2}^*$     | 62           |                             |
| $S_0 \rightarrow S_5$    | 265                        | 0.0194 | $\pi_H \rightarrow \pi_{L+1}^*$     | 65           |                             |
| $S_0 \rightarrow T_{10}$ | 253                        | 0.1119 | $\pi_{H-3} \rightarrow \pi_{L+1}^*$ | 26           |                             |
| $S_0 \rightarrow S_6$    | 234                        | 0.0307 | $\pi_H \rightarrow \pi_{L+2}^*$     | 43           |                             |
| $S_0 \rightarrow S_7$    | 227                        | 0.1119 | $\pi_{H-2} \rightarrow \pi_L^*$     | 35           |                             |
| $S_0 \rightarrow S_8$    | 209                        | 0.0039 | $\pi_H \rightarrow \pi_{L+3}^*$     | 73           |                             |
| $S_0 \rightarrow S_9$    | 208                        | 0.0327 | $\pi_{H-3} \rightarrow \pi_L^*$     | 50           |                             |
| $S_0 \rightarrow S_{10}$ | 205                        | 0.0496 | $n_{H-5} \rightarrow \pi_L^*$       | 35           |                             |
| $S_1 \rightarrow S_0$    | 435                        | 1.3446 | $\pi_H \rightarrow \pi_L^*$         | 99           | 467                         |

**Table ESI.3.** Theoretical absorption and emission wavelengths of DT, oscillator strengths, nature and composition in terms of molecular orbitals obtained by TD WB97XD/6-31+G(d)//B-3LYP/6-31+G(d) in Tol (CPCM) compared to the experimental absorption spectra.

| Transition                      | $\lambda_{th}/nm$ | f       | configuration                       | $c_i^2 / \%$ | $\lambda_{exp}/nm$ |
|---------------------------------|-------------------|---------|-------------------------------------|--------------|--------------------|
| S <sub>0</sub> →T <sub>1</sub>  | 671               | 0.0000  | $\pi_H \rightarrow \pi_L^*$         | 63           |                    |
| S <sub>0</sub> →T <sub>2</sub>  | 439               | 0.0000  | $\pi_{H-5} \rightarrow \pi_L^*$     | 70           |                    |
| S <sub>0</sub> →T <sub>3</sub>  | 400               | 0.0000  | $\pi_{H-3} \rightarrow \pi_L^*$     | 36           |                    |
| S <sub>0</sub> →T <sub>4</sub>  | 374               | 0.0000  | $n_{H-4} \rightarrow \pi_L^*$       | 72           |                    |
| S <sub>0</sub> →S <sub>1</sub>  | 370               | 1.2328  | $\pi_H \rightarrow \pi_L^*$         | 84           | 372                |
| S <sub>0</sub> →S <sub>2</sub>  | 324               | 0.0000  | $n_{H-4} \rightarrow \pi_L^*$       | 74           |                    |
| S <sub>0</sub> →T <sub>5</sub>  | 320               | 0.0000  | $\pi_{H-2} \rightarrow \pi_L^*$     | 86           |                    |
| S <sub>0</sub> →T <sub>6</sub>  | 315               | 0.0000  | $n_{H-6} \rightarrow \pi_L^*$       | 73           |                    |
| S <sub>0</sub> →T <sub>7</sub>  | 309               | 0.0000  | $\pi_{H-1} \rightarrow \pi_{L+1}^*$ | 47           |                    |
| S <sub>0</sub> →T <sub>8</sub>  | 300               | 0.0000  | $\pi_{H-3} \rightarrow \pi_{L+1}^*$ | 24           |                    |
| S <sub>0</sub> →T <sub>9</sub>  | 288               | 0.0000  | $\pi_{H-2} \rightarrow \pi_{L+2}^*$ | 70           |                    |
| S <sub>0</sub> →S <sub>3</sub>  | 280               | 0.00044 | $n_{H-6} \rightarrow \pi_L^*$       | 74           |                    |
| S <sub>0</sub> →S <sub>4</sub>  | 279               | 0.0254  | $\pi_{H-2} \rightarrow \pi_L^*$     | 79           |                    |
| S <sub>0</sub> →S <sub>5</sub>  | 271               | 0.0029  | $\pi_H \rightarrow \pi_{L+1}^*$     | 64           |                    |
| S <sub>0</sub> →T <sub>10</sub> | 269               | 0.0000  | $\pi_H \rightarrow \pi_{L+2}^*$     | 64           |                    |
| S <sub>0</sub> →S <sub>6</sub>  | 250               | 0.1087  | $\pi_{H-1} \rightarrow \pi_L^*$     | 54           |                    |
| S <sub>0</sub> →S <sub>7</sub>  | 233               | 0.0499  | $\pi_H \rightarrow \pi_{L+2}^*$     | 54           |                    |
| S <sub>0</sub> →S <sub>8</sub>  | 228               | 0.0460  | $\pi_{H-3} \rightarrow \pi_L^*$     | 49           |                    |
| S <sub>0</sub> →S <sub>9</sub>  | 216               | 0.0001  | $\pi_H \rightarrow \pi_{L+5}^*$     | 28           |                    |
| S <sub>0</sub> →S <sub>10</sub> | 211               | 0.0330  | $\pi_H \rightarrow \pi_{L+4}^*$     | 54           |                    |
| S <sub>1</sub> →S <sub>0</sub>  | 444               | 1.2931  | $\pi_H \rightarrow \pi_L^*$         | 92           | 500                |

**Table ESI.4.** Theoretical absorption and emission wavelengths of **QP**, oscillator strengths, nature and composition in terms of molecular orbitals obtained by TD WB97XD/6-31+G(d)//B-3LYP/6-31+G(d) in Tol (CPCM).

| Transition               | $\lambda_{\text{th}} / \text{nm}$ | f      | configuration                       | $c_i^2 / \%$ | $\lambda_{\text{exp}} / \text{nm}$ |
|--------------------------|-----------------------------------|--------|-------------------------------------|--------------|------------------------------------|
| $S_0 \rightarrow T_1$    | 599                               | 0.0000 | $\pi_H \rightarrow \pi_{L+1}^*$     | 38           |                                    |
| $S_0 \rightarrow T_2$    | 555                               | 0.0000 | $\pi_H \rightarrow \pi_L^*$         | 44           |                                    |
| $S_0 \rightarrow T_3$    | 440                               | 0.0000 | $\pi_{H-9} \rightarrow \pi_L^*$     | 29           |                                    |
| $S_0 \rightarrow T_4$    | 440                               | 0.0000 | $\pi_{H-8} \rightarrow \pi_L^*$     | 29           |                                    |
| $S_0 \rightarrow T_5$    | 374                               | 0.0000 | $\pi_{H-1} \rightarrow \pi_{L+3}^*$ | 23           |                                    |
| $S_0 \rightarrow T_6$    | 373                               | 0.0000 | $n_{H-7} \rightarrow \pi_{L+1}^*$   | 24           |                                    |
| $S_0 \rightarrow T_7$    | 373                               | 0.0000 | $n_{H-8} \rightarrow \pi_{L+1}^*$   | 24           |                                    |
| $S_0 \rightarrow S_1$    | 360                               | 1.2428 | $\pi_H \rightarrow \pi_L^*$         | 65           | 367                                |
| $S_0 \rightarrow T_8$    | 358                               | 0.0000 | $\pi_H \rightarrow \pi_{L+2}^*$     | 36           |                                    |
| $S_0 \rightarrow S_2$    | 329                               | 1.0724 | $\pi_H \rightarrow \pi_{L+1}^*$     | 58           |                                    |
| $S_0 \rightarrow S_3$    | 324                               | 0.0000 | $n_{H-7} \rightarrow \pi_{L+1}^*$   | 25           |                                    |
| $S_0 \rightarrow S_4$    | 324                               | 0.0000 | $n_{H-8} \rightarrow \pi_{L+1}^*$   | 25           |                                    |
| $S_0 \rightarrow T_9$    | 323                               | 0.0000 | $\pi_{H-3} \rightarrow \pi_L^*$     | 45           |                                    |
| $S_0 \rightarrow T_{10}$ | 323                               | 0.0000 | $\pi_{H-2} \rightarrow \pi_L^*$     | 44           |                                    |
| $S_0 \rightarrow S_5$    | 283                               | 0.1116 | $\pi_{H-1} \rightarrow \pi_{L+1}^*$ | 39           |                                    |
| $S_0 \rightarrow S_6$    | 281                               | 0.0004 | $n_{H-11} \rightarrow \pi_{L+1}^*$  | 20           |                                    |
| $S_0 \rightarrow S_7$    | 281                               | 0.0004 | $n_{H-12} \rightarrow \pi_{L+1}^*$  | 20           |                                    |
| $S_0 \rightarrow S_8$    | 280                               | 0.0029 | $n_{H-4} \rightarrow \pi_{L+2}^*$   | 47           |                                    |
| $S_0 \rightarrow S_9$    | 279                               | 0.0501 | $\pi_{H-3} \rightarrow \pi_L^*$     | 43           |                                    |
| $S_0 \rightarrow S_{10}$ | 278                               | 0.0059 | $\pi_{H-2} \rightarrow \pi_L^*$     | 42           |                                    |
| $S_1 \rightarrow S_0$    | 397                               | 1.2062 | $\pi_H \rightarrow \pi_L^*$         | 72           | 419                                |

**Table ESI.5.** Theoretical absorption and emission wavelengths of **QF**, oscillator strengths, nature and composition in terms of molecular orbitals obtained by TD WB97XD/6-31+G(d)//B-3LYP/6-31+G(d) in Tol (CPCM).

| Transition               | $\lambda_{\text{th}} / \text{nm}$ | f      | configuration                       | $c_i^2 / \%$ | $\lambda_{\text{exp}} / \text{nm}$ |
|--------------------------|-----------------------------------|--------|-------------------------------------|--------------|------------------------------------|
| $S_0 \rightarrow T_1$    | 903                               | 0.0000 | $\pi_H \rightarrow \pi_L^*$         | 69           |                                    |
| $S_0 \rightarrow T_2$    | 545                               | 0.0000 | $\pi_{H-1} \rightarrow \pi_L^*$     | 36           |                                    |
| $S_0 \rightarrow S_1$    | 447                               | 1.5003 | $\pi_H \rightarrow \pi_L^*$         | 84           | 442                                |
| $S_0 \rightarrow T_3$    | 440                               | 0.0000 | $\pi_{H-8} \rightarrow \pi_{L+1}^*$ | 34           |                                    |
| $S_0 \rightarrow T_4$    | 440                               | 0.0000 | $\pi_{H-9} \rightarrow \pi_{L+1}^*$ | 34           |                                    |
| $S_0 \rightarrow T_5$    | 400                               | 0.0000 | $\pi_{H-4} \rightarrow \pi_L^*$     | 28           |                                    |
| $S_0 \rightarrow T_6$    | 374                               | 0.0000 | $n_{H-6} \rightarrow \pi_{L+1}^*$   | 21           |                                    |
| $S_0 \rightarrow T_7$    | 374                               | 0.0000 | $n_{H-7} \rightarrow \pi_{L+1}^*$   | 21           |                                    |
| $S_0 \rightarrow S_2$    | 340                               | 0.6446 | $\pi_H \rightarrow \pi_{L+1}^*$     | 74           |                                    |
| $S_0 \rightarrow T_8$    | 340                               | 0.0000 | $\pi_H \rightarrow \pi_{L+3}^*$     | 20           |                                    |
| $S_0 \rightarrow S_3$    | 324                               | 0.0000 | $n_{H-7} \rightarrow \pi_{L+1}^*$   | 21           |                                    |
| $S_0 \rightarrow S_4$    | 324                               | 0.0000 | $n_{H-6} \rightarrow \pi_{L+1}^*$   | 21           |                                    |
| $S_0 \rightarrow T_9$    | 322                               | 0.0000 | $\pi_{H-3} \rightarrow \pi_L^*$     | 45           |                                    |
| $S_0 \rightarrow T_{10}$ | 322                               | 0.0000 | $\pi_{H-2} \rightarrow \pi_L^*$     | 45           |                                    |
| $S_0 \rightarrow S_5$    | 281                               | 0.0539 | $\pi_H \rightarrow \pi_{L+2}^*$     | 36           |                                    |
| $S_0 \rightarrow S_6$    | 281                               | 0.0001 | $n_{H-11} \rightarrow \pi_{L+1}^*$  | 38           |                                    |
| $S_0 \rightarrow S_7$    | 281                               | 0.0007 | $n_{H-10} \rightarrow \pi_{L+1}^*$  | 38           |                                    |
| $S_0 \rightarrow S_8$    | 280                               | 0.0502 | $\pi_{H-2} \rightarrow \pi_L^*$     | 47           |                                    |
| $S_0 \rightarrow S_9$    | 278                               | 0.0031 | $\pi_{H-3} \rightarrow \pi_L^*$     | 27           |                                    |
| $S_0 \rightarrow S_{10}$ | 269                               | 0.0930 | $\pi_{H-1} \rightarrow \pi_L^*$     | 64           |                                    |
| $S_1 \rightarrow S_0$    | 536                               | 1.4645 | $\pi_H \rightarrow \pi_L^*$         | 90           | 535                                |

**Table ESI.6.** Theoretical absorption and emission wavelengths of QT, oscillator strengths, nature and composition in terms of molecular orbitals obtained by TD WB97XD/6-31+G(d)//B-3LYP/6-31+G(d) in Tol (CPCM).

| Transition                      | $\lambda_{\text{th}} / \text{nm}$ | f      | configuration                       | $c_i^2 / \%$ | $\lambda_{\text{exp}} / \text{nm}$ |
|---------------------------------|-----------------------------------|--------|-------------------------------------|--------------|------------------------------------|
| S <sub>0</sub> →T <sub>1</sub>  | 925                               | 0.0000 | $\pi_H \rightarrow \pi_L^*$         | 72           |                                    |
| S <sub>0</sub> →T <sub>2</sub>  | 542                               | 0.0000 | $\pi_{H-1} \rightarrow \pi_L^*$     | 40           |                                    |
| S <sub>0</sub> →S <sub>1</sub>  | 445                               | 1.8965 | $\pi_H \rightarrow \pi_L^*$         | 84           | 436                                |
| S <sub>0</sub> →T <sub>3</sub>  | 440                               | 0.0000 | $\pi_{H-8} \rightarrow \pi_{L+1}^*$ | 40           |                                    |
| S <sub>0</sub> →T <sub>4</sub>  | 440                               | 0.0000 | $\pi_{H-9} \rightarrow \pi_{L+1}^*$ | 40           |                                    |
| S <sub>0</sub> →T <sub>5</sub>  | 409                               | 0.0000 | $\pi_{H-5} \rightarrow \pi_L^*$     | 26           |                                    |
| S <sub>0</sub> →T <sub>6</sub>  | 374                               | 0.0000 | $n_{H-6} \rightarrow \pi_{L+1}^*$   | 32           |                                    |
| S <sub>0</sub> →T <sub>7</sub>  | 374                               | 0.0000 | $n_{H-7} \rightarrow \pi_{L+1}^*$   | 32           |                                    |
| S <sub>0</sub> →T <sub>8</sub>  | 339                               | 0.0000 | $\pi_{H-10} \rightarrow \pi_L^*$    | 17           |                                    |
| S <sub>0</sub> →S <sub>2</sub>  | 337                               | 0.2642 | $\pi_H \rightarrow \pi_{L+1}^*$     | 65           |                                    |
| S <sub>0</sub> →T <sub>9</sub>  | 331                               | 0.0000 | $n_{H-2} \rightarrow \pi_L^*$       | 51           |                                    |
| S <sub>0</sub> →S <sub>3</sub>  | 324                               | 0.0000 | $n_{H-6} \rightarrow \pi_{L+1}^*$   | 33           |                                    |
| S <sub>0</sub> →S <sub>4</sub>  | 324                               | 0.0000 | $n_{H-7} \rightarrow \pi_{L+1}^*$   | 33           |                                    |
| S <sub>0</sub> →T <sub>10</sub> | 322                               | 0.0000 | $n_{H-2} \rightarrow \pi_L^*$       | 51           |                                    |
| S <sub>0</sub> →S <sub>5</sub>  | 285                               | 0.1199 | $\pi_H \rightarrow \pi_{L+2}^*$     | 57           |                                    |
| S <sub>0</sub> →S <sub>6</sub>  | 281                               | 0.0003 | $n_{H-11} \rightarrow \pi_{L+1}^*$  | 40           |                                    |
| S <sub>0</sub> →S <sub>7</sub>  | 281                               | 0.0004 | $n_{H-12} \rightarrow \pi_{L+1}^*$  | 40           |                                    |
| S <sub>0</sub> →S <sub>8</sub>  | 279                               | 0.0552 | $\pi_{H-4} \rightarrow \pi_L^*$     | 45           |                                    |
| S <sub>0</sub> →S <sub>9</sub>  | 279                               | 0.0003 | $\pi_{H-3} \rightarrow \pi_L^*$     | 44           |                                    |
| S <sub>0</sub> →S <sub>10</sub> | 273                               | 0.0296 | $n_{H-2} \rightarrow \pi_L^*$       | 51           |                                    |
| S <sub>1</sub> →S <sub>0</sub>  | 538                               | 1.8463 | $\pi_H \rightarrow \pi_L^*$         | 91           | 526                                |

## Femtosecond Transient Absorption



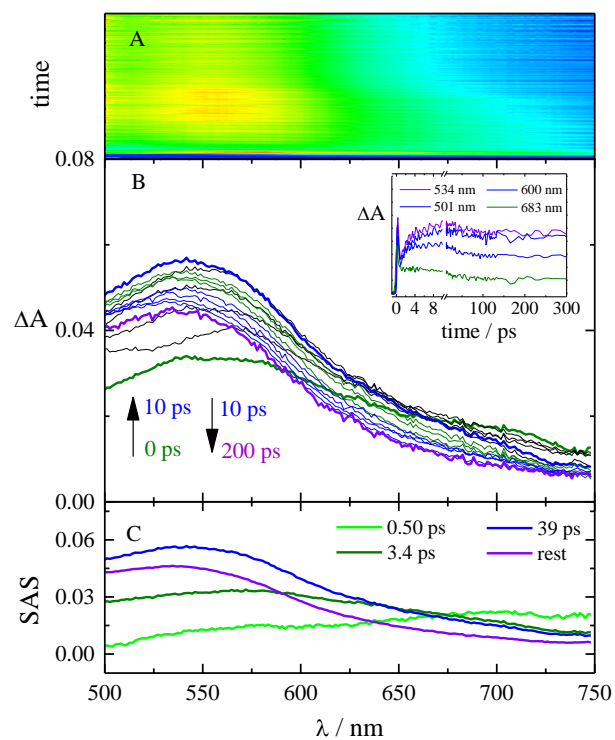

**Figure ESI.7.** Femtosecond Transient absorption measurements of compound DP in Tol: experimental 3D data matrix (panel A); main time-resolved absorption spectra (panel B) and representative kinetics recorded at significant wavelengths (inset); Species Associated Spectra (SAS) of main transients accompanied by relative lifetimes, obtained by Target Analysis (panel C).

**Table ESI.7.** Spectral and kinetic properties of DP in several solvents obtained by transient absorption measurements with fs time resolution.

| Solvent        | $\lambda$ / nm                                | $\tau$ / ps                | Transient                                                              |
|----------------|-----------------------------------------------|----------------------------|------------------------------------------------------------------------|
| Tol            | 560(+)<br>545(-)<br>595(+)<br>535(+)          | 0.50<br>3.4<br>39<br>Rest  | solv.<br>solv. + <sup>1</sup> LE<br>T <sub>1</sub> '<br>T <sub>1</sub> |
| Tol/An (50/50) | 540(+)<br>530(-)<br>580(+)<br><490(+), 540(+) | 0.6<br>4.2<br>75<br>Rest   | solv.<br>solv. + <sup>1</sup> LE<br>T <sub>1</sub> '<br>T <sub>1</sub> |
| An             | 550(+)<br>550(-)<br>560(+)<br><490(+), 545(+) | 0.55<br>4.4<br>70<br>Rest  | solv.<br>solv. + <sup>1</sup> LE<br>T <sub>1</sub> '<br>T <sub>1</sub> |
| EtAc           | 530(+)<br>520(-)<br>580(+)<br><490(+), 520(+) | 0.2<br>2.6<br>320<br>Rest  | solv.<br>solv. + <sup>1</sup> LE<br>T <sub>1</sub> '<br>T <sub>1</sub> |
| DCE            | 555(+)<br>530(-)<br>590(+)<br><490(+), 540(+) | 0.3<br>4.6<br>100<br>Rest  | solv.<br>solv. + <sup>1</sup> LE<br>T <sub>1</sub> '<br>T <sub>1</sub> |
| Ac             | 530(+)<br>550(-)<br>540(+)<br><490(+), 530(+) | 0.19<br>1.3<br>240<br>Rest | solv.<br>solv. + <sup>1</sup> LE<br>T <sub>1</sub> '<br>T <sub>1</sub> |
| MeCN           | 560(+)<br>560(-), 600(-)<br>600(+)<br>540(+)  | 0.26<br>21<br>82<br>Rest   | solv.<br><sup>1</sup> LE<br>T <sub>1</sub> '<br>T <sub>1</sub>         |
| DMF            | 555(+)<br>545(-)<br>590(+)<br><490(+), 560(+) | 0.66<br>6.6<br>290<br>Rest | solv.<br>solv. + <sup>1</sup> LE<br>T <sub>1</sub> '<br>T <sub>1</sub> |
| DMSO           | 555(+)<br>540(-)<br>570(+)<br><490(+), 565(+) | 0.76<br>7.8<br>180<br>Rest | solv.<br>solv. + <sup>1</sup> LE<br>T <sub>1</sub> '<br>T <sub>1</sub> |

**Table ESI.8.** Spectral and kinetic properties of DF in several solvents obtained by transient absorption measurements with fs time resolution.

| Solvent        | $\lambda$ / nm                                                                                  | $\tau$ / ps                        | Transient                                                                       |
|----------------|-------------------------------------------------------------------------------------------------|------------------------------------|---------------------------------------------------------------------------------|
| Tol            | 530(+), 590(+)<br>530(+), 580(+)<br>560(+)<br>530(+), 580(+)                                    | 0.86<br>9.2<br>89<br>Rest          | solv.<br><sup>1</sup> LE<br>T <sub>1</sub><br>T <sub>1</sub>                    |
| Tol/An (50/50) | 520(+), 570(+)<br><540(-), 555(+), 600(-)<br>545(+)<br>590(+)                                   | 0.65<br>3.3<br>410<br>Rest         | solv.<br><sup>1</sup> LE<br><sup>1</sup> CT<br>T <sub>1</sub>                   |
| An             | 520(+), 570(+)<br>520(-), 560(+)<br>535(+), 605(-)<br>540(+), 590(+)                            | 0.89<br>7.2<br>320<br>Rest         | solv.<br><sup>1</sup> LE<br><sup>1</sup> CT<br>T <sub>1</sub>                   |
| EtAc           | <500(-), 560(+)<br>520(-), 550(+), 590(-), 670(+)<br>530(+), 580(-)<br>530(+), 580(+)           | 0.67<br>10<br>105<br>Rest          | solv.<br><sup>1</sup> LE<br><sup>1</sup> CT<br>T <sub>1</sub>                   |
| DCE            | <500(-), 520(+), 570(+)<br>520(-), 560(+), 630(+)<br>535(+), 610(-)<br>525(+), 600(-)<br>580(+) | 0.78<br>3.8<br>95<br>1600<br>Rest  | solv.<br>solv. + <sup>1</sup> LE<br>SR/ISO<br><sup>1</sup> CT<br>T <sub>1</sub> |
| Ac             | 515(-), 565(+)<br>530(+), 595(-)<br>520(+), 595(-)<br>580(+)                                    | 0.88<br>26<br>2000<br>Rest         | solv. + <sup>1</sup> LE<br>SR/ISO<br><sup>1</sup> CT<br>T <sub>1</sub>          |
| MeCN           | 505(-), 655(+)<br>525(+), 640(-)<br>510(+), 640(-)<br>520(+), 580(+)                            | 0.55<br>37<br>870<br>Rest          | solv. + <sup>1</sup> LE<br>SR/ISO<br><sup>1</sup> CT<br>T <sub>1</sub>          |
| DMF            | <540(-), 570(+)<br>505(-), 560(-), 670(+)<br>525(+), 640(-)<br>510(+), 630(-)<br>510(+)         | 0.55<br>4.2<br>67<br>1600<br>Rest  | solv.<br>solv. + <sup>1</sup> LE<br>SR/ISO<br><sup>1</sup> CT<br>T <sub>1</sub> |
| DMSO           | 515(-), 605(+)<br>500(-), 530(+), 580(-), 695(+)<br>520(+), 660(-)<br>505(+), 650(-)<br>580(+)  | 0.79<br>4.1<br>205<br>1490<br>Rest | solv.<br>solv. + <sup>1</sup> LE<br>SR/ISO<br><sup>1</sup> CT<br>T <sub>1</sub> |

**Table ESI.9.** Spectral and kinetic properties of DT in several solvents obtained by transient absorption measurements with fs time resolution.

| Solvent | $\lambda$ / nm                                                                                  | $\tau$ / ps                        | Transient                                                                   |
|---------|-------------------------------------------------------------------------------------------------|------------------------------------|-----------------------------------------------------------------------------|
| Tol     | 565(+)<br><540(-), 595(-)<br>550(+), 580(+)                                                     | 0.30<br>5.9<br>rest                | solv.<br><sup>1</sup> LE<br>T <sub>1</sub>                                  |
| Tol/An  | 560(+), 700(-)<br><535(-), 560(+)<br>540(+)<br>580(+)                                           | 0.46<br>4.0<br>90<br>rest          | solv.<br>solv. + <sup>1</sup> LE<br><sup>1</sup> CT<br>T <sub>1</sub>       |
| An      | 555(+), 740(-)<br><540(-), 555(+)<br>535(+), 620(-)<br>590(+)                                   | 0.28<br>4.3<br>210<br>rest         | solv.<br>solv. + <sup>1</sup> LE<br><sup>1</sup> CT<br>T <sub>1</sub>       |
| EtAc    | 555(+), 760(+)<br><530(-), 540(+)<br>525(+), 590(-)<br>550(+)                                   | 0.37<br>3.4<br>76<br>rest          | solv.<br><sup>1</sup> LE<br><sup>1</sup> CT<br>T <sub>1</sub>               |
| DCE     | <510(-), 560(+)<br>515(-), 550(+)<br>535(+), 610(-)<br>525(+), 605(-)<br>580(+)                 | 0.61<br>4.0<br>88<br>1500<br>rest  | solv.<br>solv. + <sup>1</sup> LE<br>SR<br><sup>1</sup> CT<br>T <sub>1</sub> |
| Ac      | <530(-), 555(+)<br>520(+), 595(-)<br>515(+), 595(-)<br>575(+)                                   | 0.61<br>61<br>1500<br>rest         | solv. + <sup>1</sup> LE<br>SR<br><sup>1</sup> CT<br>T <sub>1</sub>          |
| MeCN    | 500(-), 550(+), 630(+)<br>515(+), 620(-)<br>505(+), 620(-)<br>580(+)                            | 0.38<br>46<br>1000<br>rest         | solv. + <sup>1</sup> LE<br>SR<br><sup>1</sup> CT<br>T <sub>1</sub>          |
| DMF     | 565(+), 690(-)<br><535(-), 650(+)<br>515(+), 610(-)<br>510(+), 615(-)<br>520(+)                 | 0.63<br>1.5<br>78<br>1800<br>rest  | solv.<br>solv. + <sup>1</sup> LE<br>SR<br><sup>1</sup> CT<br>T <sub>1</sub> |
| DMSO    | 515(-), 560(+)<br><520(-), 535(+), 570(-), 670(+)<br>515(+), 625(-)<br>510(+), 650(-)<br>570(+) | 0.49<br>3.6<br>150<br>1800<br>rest | solv.<br>solv. + <sup>1</sup> LE<br>SR<br><sup>1</sup> CT<br>T <sub>1</sub> |

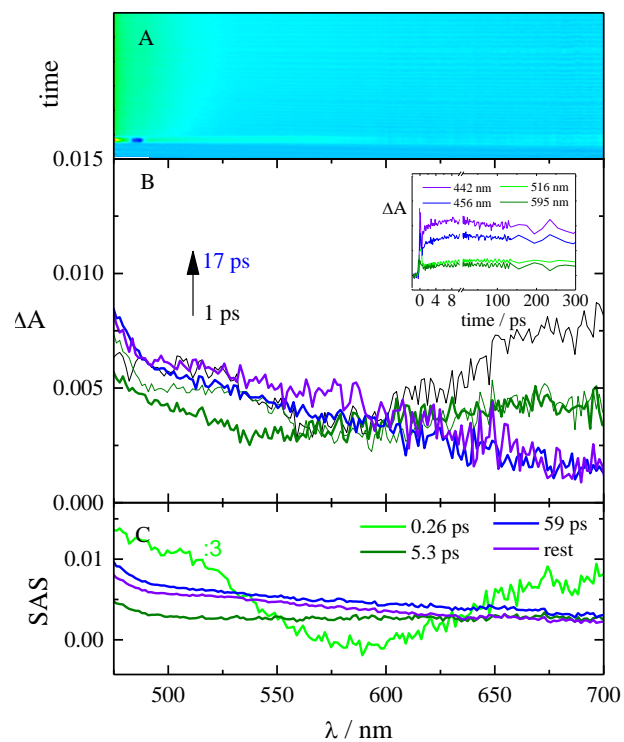

**Figure ESI.8.** Femtosecond Transient absorption measurements of compound **QP** in Tol: experimental 3D data matrix (panel A); main time-resolved absorption spectra (panel B) and representative kinetics recorded at significant wavelengths (inset); Species Associated Spectra (SAS) of main transients accompanied by relative lifetimes, obtained by Target Analysis (panel C).

**Table ESI.10.** Spectral and kinetic properties of **QP** in several solvents obtained by transient absorption measurements with fs time resolution.

| Solvent | $\lambda$ / nm                                                         | $\tau$ / ps                | Transient                                                             |
|---------|------------------------------------------------------------------------|----------------------------|-----------------------------------------------------------------------|
| Tol     | 450(-), 500(+)<br>700(-)<br>440(+)<br>450(+), 520(+)                   | 0.26<br>5.3<br>59<br>Rest  | solv.<br><sup>1</sup> LE<br>T <sub>1</sub><br>T <sub>1</sub>          |
| Tol/An  | 520(+)<br>660(-)<br>broad<br><480(+), 660(+)                           | 0.34<br>41<br>460<br>Rest  | solv.<br><sup>1</sup> LE<br>T <sub>1</sub><br>T <sub>1</sub>          |
| An      | 515(+)<br><500(-), 660(-)<br>broad<br><480(+), 660(+)                  | 0.15<br>25<br>290<br>Rest  | solv.<br><sup>1</sup> LE<br>T <sub>1</sub><br>T <sub>1</sub>          |
| EtAc    | 530(+)<br><500(-), 610(-)<br><480(+), broad<br><480(+), broad          | 0.27<br>3.8<br>110<br>Rest | solv.<br><sup>1</sup> LE<br>T <sub>1</sub><br>T <sub>1</sub>          |
| DCE     | 525(+)<br><500(-), 600(-)<br>broad<br><480(+), broad                   | 0.53<br>3.8<br>170<br>Rest | solv.<br>solv. + <sup>1</sup> LE<br><sup>1</sup> CT<br>T <sub>1</sub> |
| Ac      | 510(+)<br>495(+), 720(-)<br>broad<br><490(+), broad                    | 0.18<br>12<br>160<br>Rest  | solv.<br><sup>1</sup> LE<br><sup>1</sup> CT<br>T <sub>1</sub>         |
| MeCN    | 450(-), 515(+)<br>455(-), 530(-)<br>450(+), 490(+)<br>450(+), 520(+)   | 0.26<br>2.0<br>48<br>Rest  | solv.<br><sup>1</sup> LE<br><sup>1</sup> CT<br>T <sub>1</sub>         |
| DMF     | <500(-), 530(+)<br><500(-), 560(-)<br>490(+), 670(+)<br><480(+), broad | 0.58<br>4.7<br>92<br>Rest  | solv.<br>solv. + <sup>1</sup> LE<br><sup>1</sup> CT<br>T <sub>1</sub> |
| DMSO    | 470(-), 525(+)<br>500(-), 545(-)<br>490(+)<br><450(+), broad           | 0.76<br>2.9<br>93<br>Rest  | solv.<br>solv. + <sup>1</sup> LE<br><sup>1</sup> CT<br>T <sub>1</sub> |

**Table ESI.11.** Spectral and kinetic properties of **QF** in several solvents obtained by transient absorption measurements with fs time-resolution.

| Solvent | $\lambda$ / nm                                                                              | $\tau$ / ps                        | Transient                                                                   |
|---------|---------------------------------------------------------------------------------------------|------------------------------------|-----------------------------------------------------------------------------|
| Tol     | 560(+)<br>690(+)<br>540(-), 685(+)<br>550(-), 690(+)<br>620(+)                              | 0.37<br>1.8<br>118<br>1850<br>Rest | solv.<br>solv.<br>SR<br><sup>1</sup> LE<br>T <sub>1</sub>                   |
| Tol/An  | 550(+), 700(-)<br>500(-), 740(+)<br>560(-), 670(+)<br>565(-), 685(+)<br>620(+)              | 0.46<br>6.2<br>150<br>2250<br>Rest | solv.<br>solv. + <sup>1</sup> LE<br>SR<br><sup>1</sup> CT<br>T <sub>1</sub> |
| An      | 550(+), 695(-)<br>530(-), 710(+)<br>580(-), 695(+)<br>580(-), 690(+)<br>635(+)              | 0.39<br>8.4<br>185<br>2500<br>Rest | solv.<br>solv. + <sup>1</sup> LE<br>SR<br><sup>1</sup> CT<br>T <sub>1</sub> |
| EtAc    | 515(-), 640(+), 670(-), 700(+)<br>675(+), 565(-)<br>565(-), 630(+), 670(+)<br>610(+)        | 2.9<br>61<br>2200<br>Rest          | solv. + <sup>1</sup> LE<br>SR<br><sup>1</sup> CT<br>T <sub>1</sub>          |
| DCE     | 525(-), 660(+), 720(+)<br>600(-), 665(-), 705(+)<br>680(+)<br><495(-),620(+), 675(+),760(-) | 2.2<br>5.8<br>190<br>2000          | solv.<br>solv. + <sup>1</sup> LE<br>SR<br><sup>1</sup> CT                   |
| Ac      | 580(-), 655(-), 690(+)<br>665(+)<br>600(+), 660(+), 760(-)                                  | 1.2<br>100<br>1500                 | solv. + <sup>1</sup> LE<br>SR<br><sup>1</sup> CT                            |
| MeCN    | 650(-), 690(+)<br>665(+)<br>650(+), 600(+), 750(-)                                          | 0.50<br>61<br>820                  | solv.<br><sup>1</sup> LE<br><sup>1</sup> CT                                 |
| DMF     | 560(-), 675(+), 705(+)<br>660(-), 695(+), 610(-)<br>670(+)<br><500(-),610(+),665(+),750(-)  | 1.2<br>5.1<br>185<br>1200          | solv.<br><sup>1</sup> LE<br>SR<br><sup>1</sup> CT                           |
| DMSO    | 580(-), 680(-), 720(+)<br>600(-), 660(-), 705(+)<br>670(+)<br><500(-),610(+),665(+),760(-)  | 1.3<br>6.9<br>210<br>750           | solv.<br><sup>1</sup> LE<br>SR<br><sup>1</sup> CT                           |

**Table ESI.12.** Spectral and kinetic properties of QT in several solvents obtained by transient absorption measurements with fs time resolution.

| Solvent | $\lambda$ / nm                                                                                 | $\tau$ / ps                        | Transient                                                                   |
|---------|------------------------------------------------------------------------------------------------|------------------------------------|-----------------------------------------------------------------------------|
| Tol     | 535(+), 690(-)<br>525(-), 700(+), 750(+)<br>540(-), 580(-), 710(+)<br>620(+)                   | 0.26<br>105<br>940<br>Rest         | solv.<br>SR<br><sup>1</sup> LE<br>T <sub>1</sub>                            |
| Tol/An  | 540(+), 700(-)<br>530(-), 580(+), 740(+)<br>550(-), 695(+)<br>570(-), 700(+), 740(+)<br>630(+) | 0.42<br>4.7<br>150<br>1000<br>Rest | solv.<br>solv. + <sup>1</sup> LE<br>SR<br><sup>1</sup> CT<br>T <sub>1</sub> |
| An      | 540(+), 700(-)<br><570(-), 740(+)<br>565(-), 700(+)<br>575(-), 700(+)<br>635(+)                | 0.52<br>6.7<br>190<br>1200<br>Rest | solv.<br>solv. + <sup>1</sup> LE<br>SR<br><sup>1</sup> CT<br>T <sub>1</sub> |
| EtAc    | <560(-),690(+),740(+)<br>595(+), 560(-)<br>565(-), 695(+)<br>620(+)                            | 1.9<br>100<br>1000<br>Rest         | solv. + <sup>1</sup> LE<br>SR<br><sup>1</sup> CT<br>T <sub>1</sub>          |
| DCE     | <540(-),565(+),695(+)<br>555(-),670(+),735(+)<br>575(-), 705(+)<br>525(+), 700(+)<br>640(+)    | 0.5<br>4.0<br>170<br>1700<br>Rest  | solv.<br>solv. + <sup>1</sup> LE<br>SR<br><sup>1</sup> CT<br>T <sub>1</sub> |
| Acetone | 550(-), 665(-), 730(+)<br>695(+)<br>690(+)<br>625(+)                                           | 0.97<br>84<br>1550<br>Rest         | solv. + <sup>1</sup> LE<br>SR<br><sup>1</sup> CT<br>T <sub>1</sub>          |
| MeCN    | 542(+), 580(+)<br>560(-), 675(-), 720(+)<br>690(+)<br>590(+), 680(+)                           | 0.1<br>0.50<br>110<br>1000         | solv.<br>solv. + <sup>1</sup> LE<br>SR<br><sup>1</sup> CT                   |
| DMF     | 525(-), 685(+)<br>575(-), 690(-), 730(+)<br>700(+)<br>695(+)                                   | 0.5<br>1.9<br>230<br>1700          | solv.<br>solv. + <sup>1</sup> LE<br>SR<br><sup>1</sup> CT                   |
| DMSO    | 560(-), 675(+)<br>610(-), 680(-), 735(+)<br>695(+)<br>695(+), 780(-)                           | 0.72<br>4.0<br>410<br>1270         | solv.<br>solv. + <sup>1</sup> LE<br>SR<br><sup>1</sup> CT                   |



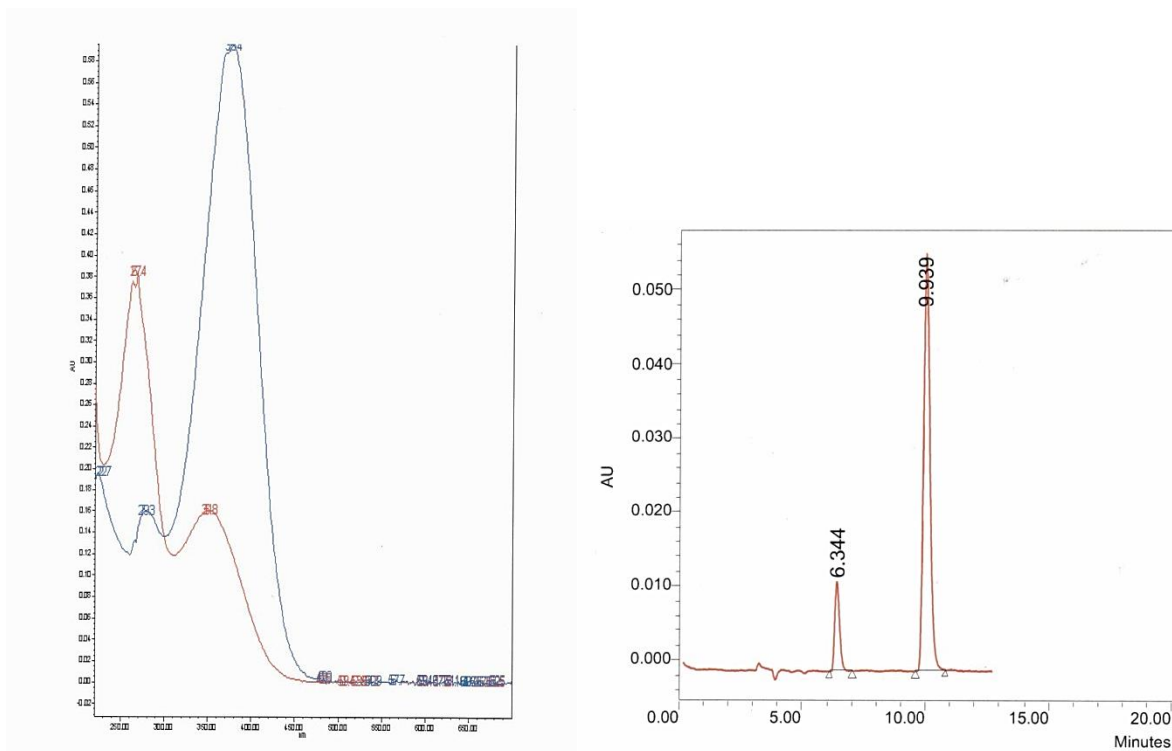

**Figure ESI.9.** Absorption spectrum of the cis (red line) and trans (blue line) isomers of **DT** in the eluent mixture (MeCN/water, 70:30, left panel) and chromatographic peaks for cis (6.344) and trans (9.939) **DT** monitored at the isosbestic point (297 nm) after irradiation of a sample of pure trans-**DT** in Tol at 375 nm.
